# Supplementary material for: A comprehensive dataset of microbial abundance, dissolved organic carbon, and nitrogen in Tibetan Plateau glaciers
Source: Copernicus journal article supplement (doi:10.5194/essd-14-2303-2022), 2022-05-13
Supplement: Supplementary file 1 [file essd-14-2303-2022-supplement.zip]

Archive with 2 entries (2 files):
- essd-14-2303-2022-supplement-title-page.pdf
- Glacier info.xlsx
