# Supplementary material for: A comprehensive dataset of microbial abundance, dissolved organic carbon, and nitrogen in Tibetan Plateau glaciers
Source: Copernicus journal article supplement (doi:10.5194/essd-14-2303-2022), 2022-05-13
Supplement: Supplementary file 1 [file essd-14-2303-2022-supplement.zip › essd-14-2303-2022-supplement-title-page.pdf]

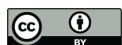

## *Supplement of*

# **A comprehensive dataset of microbial abundance, dissolved organic carbon, and nitrogen in Tibetan Plateau glaciers**

**Yongqin Liu et al.**

*Correspondence to:* Junzhi Liu ([liujunzhi@lzu.edu.cn](mailto:liujunzhi@lzu.edu.cn))

- [essd-14-2303-2022-supplement-title-page.pdf](#)
- [Glacier info.xlsx](#)

The copyright of individual parts of the supplement might differ from the article licence.
