# Supplementary material for: A comprehensive dataset of microbial abundance, dissolved organic carbon, and nitrogen in Tibetan Plateau glaciers
Source: Copernicus journal article supplement (doi:10.5194/essd-14-2303-2022), 2022-05-13
Supplement: Supplementary file 1 [file essd-14-2303-2022-supplement.zip › Glacier info.xlsx]

## Sheet: Glacier information
GlacierName	GlacierNameCN	Abbreviation	Lon	Lat	HasMicroIcecore	HasMicroSnowpit	HasDOC/TNIcecore	HasDOC/TNSnowpit	HasDOC/TNSurfaceice	HasDOC/TNSurfacesnow	HasDOC/TNRunoff
24K	24K冰川	24K	95.7325	29.7539	No	No	No	No	Yes	Yes	Yes
Aza	阿扎冰川	AZ	96.8186	29.139	No	No	No	No	Yes	No	Yes
Cuopugou	措普沟冰川	CPG	99.5	30.5667	Yes	No	Yes	No	No	No	No
Dunde	敦德冰川	DD	96.4667	38.1	No	Yes	Yes	No	Yes	Yes	No
Tonkmadi	冬克玛底冰川	DKMD	92.06	33.084	No	No	No	No	Yes	Yes	Yes
Demura	德木拉冰川	DML	97.0193	29.3572	No	No	No	No	No	Yes	No
East Rongbuk	东绒布冰川	ERB	86.95	28.036	Yes	Yes	Yes	Yes	Yes	Yes	Yes
Guliya	古里雅	GLY	81.465	35.253	No	No	No	No	No	Yes	No
Glacier No.15	15号冰川	G15	75.06	38.24	No	No	No	No	No	Yes	Yes
Geladandong	格拉丹东冰川	GLDD	91.22	33.12	Yes	Yes	No	Yes	No	No	No
Khunjerab	红旗拉普冰川	HQLP	75.45	36.82	No	No	No	No	No	Yes	No
Jiemayangzong	杰马央宗冰川	JMYZ	82.2498	30.3144	No	No	No	No	No	No	Yes
Kuoqionggangri	廓琼岗日冰川	KQGR	90.1913	29.8591	No	No	No	No	Yes	Yes	Yes
Kangwure	抗物热冰川	KWR	85.816	28.47	No	No	No	No	No	Yes	No
Kangwaxihe	康瓦西河冰川	KWX	75.32	38.41	No	No	No	No	No	Yes	No
Lang'adingri	朗阿定日冰川	LADR	90.07	28.35	No	No	No	No	No	Yes	No
Laohugou	老虎沟冰川	LHG	96.528	39.434	Yes	No	No	No	No	No	No
Mengdagangri	蒙达岗日冰川	MDGR	90.587	28.4632	No	Yes	No	No	Yes	No	Yes
Mugagangqiong	木嘎岗穹冰川	MGGQ	87.4897	32.234	No	No	No	No	Yes	Yes	Yes
Muji	木吉冰川	MJ	73.75	39.1667	No	No	Yes	No	No	Yes	No
Muztagh Ata	慕士塔格冰川	MSTG	75.1158	38.2756	Yes	No	Yes	No	No	Yes	Yes
Noijin Kangsang	宁金抗沙冰川	NJKS	90.1	28.9	Yes	No	Yes	No	Yes	No	No
Nujiang source	怒江源头	NJYT	92.2167	32.7167	No	No	No	No	Yes	Yes	No
Nima	尼玛冰川	NM	87.48	32.25	No	No	No	No	No	Yes	No
Namunani	纳木那尼冰川	NMNN	81.33	30.46	No	No	No	No	No	Yes	No
Palon No.4	帕隆4号冰川	PL4	96.9333	29.25	No	Yes	No	Yes	Yes	Yes	Yes
Trama	曲玛冰川	QM	96.8833	29.3	No	No	No	No	Yes	Yes	Yes
Qiangtang No.1	羌塘1号冰川	QT1	88.4167	33.1667	No	No	No	No	Yes	Yes	Yes
Qiangyong	枪勇冰川	QY	90.2216	28.8534	No	No	No	No	Yes	Yes	Yes
Shuanghu	双湖冰川	SH	88.69	33.3	No	No	No	No	No	Yes	No
TanggulaLongxiazaiLongba	唐古拉龙匣宰陇巴冰川	TGL	92.0325	33.1116	No	No	No	No	Yes	Yes	Yes
Xiagangjiang	夏岗江冰川	XGJ	85.1366	31.5551	No	No	No	No	No	Yes	No
Yala	雅拉冰川	Yala	85.6169	28.2654	No	Yes	No	No	Yes	Yes	No
Zhadang	扎当冰川	ZD	91.7217	30.2976	No	Yes	No	Yes	No	No	No
Zepugou	泽普沟冰川	ZPG	95.17	30.3	No	No	No	No	No	Yes	No
Zuoqiupu	作求普冰川	ZQP	96.92	29.21	Yes	No	Yes	No	No	No	No
Zhuxigou	朱西沟冰川	ZXG	95.5333	30.0167	No	No	No	No	Yes	Yes	Yes
